# Supplementary material for: Developing Indicators to Measure Critical Health Literacy in the Context of Norwegian Lower Secondary Schools
Source: MDPI journal article supplement (doi:10.3390/ijerph19053116), 2022-03-07
Supplement: s1 [file s1]

**Table S1:** Descriptive statistics for each item on the piloted version of the CHLA-Q (second draft)

| Var name                                                   | Scale A Information appraisal                                                            | N   | Mean | SD   | Kurtosis | Variance | Skew  | Chronbach's $\alpha$ if item is dropped | ITC  |
|------------------------------------------------------------|------------------------------------------------------------------------------------------|-----|------|------|----------|----------|-------|-----------------------------------------|------|
| How easy or difficult is it for you to...                  |                                                                                          |     |      |      |          |          |       |                                         |      |
| chl1                                                       | ...compare information about health from different sources                               | 113 | 3.21 | 0.91 | -0.17    | 0.76     | -0.21 | 0.85                                    | 0.52 |
| chl2                                                       | ...find out if health related information is right of wrong                              | 114 | 3.03 | 0.88 | 0.22     | 0.74     | 0.18  | 0.85                                    | 0.63 |
| chl3                                                       | ...decide if health related information is true                                          | 111 | 2.96 | 0.74 | -0.11    | 0.52     | -0.08 | 0.85                                    | 0.56 |
| chl4                                                       | ...find out if health related information can be trusted                                 | 114 | 3.30 | 0.90 | -0.09    | 0.78     | -0.47 | 0.85                                    | 0.60 |
| chl5                                                       | ...decide if a source of health information can be trusted                               | 113 | 3.27 | 0.78 | 0.31     | 0.63     | -0.18 | 0.85                                    | 0.61 |
| chl6                                                       | ...recognize information about health that is also a commercial                          | 114 | 3.37 | 0.96 | -0.32    | 0.94     | -0.49 | 0.86                                    | 0.50 |
| chl7                                                       | ...ask for help if you doubt that health information can be trusted                      | 114 | 3.68 | 0.99 | 0.45     | 0.92     | -0.7  | 0.86                                    | 0.43 |
| chl8                                                       | ...find out if health related information fits you in the current situation              | 113 | 3.31 | 0.92 | -0.32    | 0.86     | -0.3  | 0.85                                    | 0.66 |
| chl9                                                       | ...judge if health information applies to your context                                   | 114 | 3.26 | 0.88 | 0.03     | 0.80     | -0.38 | 0.85                                    | 0.65 |
| Scale B Awareness of social determinants of health.        |                                                                                          | N   | Mean | SD   | Kurtosis | Variance | Skew  | Chronbach's $\alpha$ if item is dropped | ITC  |
| To what degree to you agree with the following statements? |                                                                                          |     |      |      |          |          |       |                                         |      |
| chl10                                                      | I am mostly responsible for my own health                                                | 113 | 3.22 | 0.55 | 1.44     | 0.30     | -0.24 | 0.57                                    | 0.05 |
| chl11                                                      | A healthy lifestyle is the most important thing for a persons health                     | 114 | 3.00 | 0.65 | -0.67    | 0.43     | 0.00  | 0.53                                    | 0.19 |
| chl12                                                      | Some groups in society have poorer opportunities for good health                         | 112 | 3.12 | 0.65 | -0.71    | 0.44     | -0.12 | 0.43                                    | 0.51 |
| chl13                                                      | Everybody has the same opportunities for good health                                     | 113 | 2.80 | 0.85 | -0.16    | 0.68     | -0.57 | 0.53                                    | 0.22 |
| chl14                                                      | Where you grow up could have a significant impact on your health                         | 112 | 3.11 | 0.63 | 0.22     | 0.37     | -0.30 | 0.47                                    | 0.37 |
| chl15                                                      | Health is determined by where you live, but people can choose to live wherever they want | 111 | 2.68 | 0.70 | -0.26    | 0.49     | -0.09 | 0.56                                    | 0.09 |
| chl16                                                      | It is unfair that some groups in society have poorer health than others                  | 113 | 3.01 | 0.77 | -0.44    | 0.59     | -0.36 | 0.48                                    | 0.35 |
| chl17                                                      | Good opportunities for education and work are important for health                       | 114 | 3.04 | 0.55 | 0.20     | 0.28     | 0.02  | 0.50                                    | 0.35 |
| Citizenship for health and well-being.                     |                                                                                          | N   | Mean | SD   | Kurtosis | Variance | Skew  | Chronbach's $\alpha$ if item is dropped | ITC  |
| I am a person that...                                      |                                                                                          |     |      |      |          |          |       |                                         |      |
| chl18                                                      | ...can share information on factors that influence health with others                    | 114 | 3.63 | 0.91 | -0.04    | 0.88     | -0.46 | 0.87                                    | 0.62 |
| chl19                                                      | ...can discuss my worries about health with others                                       | 113 | 3.39 | 0.99 | -0.36    | 1.01     | -0.39 | 0.87                                    | 0.52 |
| chl20                                                      | ...can contribute to the well-being of others in my class                                | 113 | 3.92 | 0.79 | 2.16     | 0.65     | -1.04 | 0.86                                    | 0.63 |
| chl21                                                      | ...can make sure that my ideas get executed (e.g., in cooperation with others)           | 114 | 3.43 | 0.91 | 0.25     | 0.84     | -0.38 | 0.87                                    | 0.62 |
| chl22                                                      | ...am aware of how my actions can influence others (e.g., attitude, mood)                | 112 | 3.98 | 0.77 | 1.03     | 0.60     | -0.67 | 0.87                                    | 0.54 |
| chl23                                                      | ...believe my knowledge on health could be useful for others                             | 113 | 2.88 | 0.86 | -0.08    | 0.73     | -0.19 | 0.87                                    | 0.61 |
| chl24                                                      | ...can help others if they are feeling bad                                               | 112 | 4.09 | 0.79 | 1.44     | 0.61     | -0.92 | 0.86                                    | 0.71 |
| chl25                                                      | ...can help to find solutions that is acceptable to all parties                          | 114 | 3.55 | 0.8  | 0.6      | 0.67     | -0.27 | 0.86                                    | 0.64 |
| chl26                                                      | ...can support others if they are feeling sad                                            | 114 | 4.28 | 0.81 | 3.39     | 0.68     | -1.52 | 0.87                                    | 0.63 |
| chl27                                                      | ...listen to what others know about health (e.g., friends, classmates)                   | 113 | 3.90 | 0.78 | 1.32     | 0.61     | -0.84 | 0.87                                    | 0.57 |
| chl28                                                      | ...easily can talk to others, even if I don't know them to well                          | 114 | 3.01 | 1.04 | -0.58    | 1.09     | 0.12  | 0.88                                    | 0.44 |

**Table S2.** List studies and items from LR.

| Instrument                                                            | Short name | Items targeting domains of critical health literacy                                                                                | Factor/component as described in original article | Relevant to specific domain of CHL | Short description of instrument:                                                                                                                                                                                                                                                                                                                                                                                                                                                                                                                                                                                                                                                                                                                                                                                                                                                                                                                                                                                                                                                                                                                                                                                                       | References |
|-----------------------------------------------------------------------|------------|------------------------------------------------------------------------------------------------------------------------------------|---------------------------------------------------|------------------------------------|----------------------------------------------------------------------------------------------------------------------------------------------------------------------------------------------------------------------------------------------------------------------------------------------------------------------------------------------------------------------------------------------------------------------------------------------------------------------------------------------------------------------------------------------------------------------------------------------------------------------------------------------------------------------------------------------------------------------------------------------------------------------------------------------------------------------------------------------------------------------------------------------------------------------------------------------------------------------------------------------------------------------------------------------------------------------------------------------------------------------------------------------------------------------------------------------------------------------------------------|------------|
| <b>The Health Literacy Assessment Scale</b>                           | HAS-A      | How often do you get confused because you find different information about the same health topic?                                  | Process / Confusion                               | Information appraisal              | The Health Literacy Assessment Scale for adolescents (HAS-A) is based on a framework of four areas within health literacy, that is obtain, understand, communicate and process health information (Manganello, DeVelis, Davis, & Schottler-Thal, 2015). After a factor analysis to identify self-report items three factors emerged, that is functional health literacy, communication, and confusion. The measure focuses on the health care setting, but also include items more related to health promotion. The confusion domain separates this measure a little from other tools described here. Some items here might be negatively correlated with the appraisal or action domain in the CHL framework, that is if a person gets confused from different information, that is an indication of low levels of critical appraisal skills. The wording of the item is, how often do you get confused because you find different information about the same health topic? Furthermore, the study provides some evidence that self-reported HL is correlated with performance-based HL because all self-reported items are compared with a “gold-standard” performance-based items from REALM-teen and NVS (Manganello et al., 2015) | [1]        |
| <b>Measurement of Health Literacy Among Adolescents Questionnaire</b> | MOHLAA-Q   | How easy or difficult is it for you to... judge which information about an illness in the media you can trust and which you cannot | Dealing with health-related information           | Information appraisal              | The Measurement of Health Literacy Among Adolescents Questionnaire (MOHLAA-Q) are recently developed as an age adjusted generic instrument for adolescents aged 14-17 years in Germany (Domanska et al., 2020). In the process the HLS-EU-Q47-GER was used as a blueprint and, based on qualitative and quantitative investigations items were modified and adapted to the target group. Final tool consisted for four scales with 29                                                                                                                                                                                                                                                                                                                                                                                                                                                                                                                                                                                                                                                                                                                                                                                                  | [2]        |

|                                                    |          |                                                                                                                                   |                                         |                       |                                                                                                                                                                                                                                                                                                                                                                                                                                                                                                                                                                                                                                                                                                                                                                                                                                                                                                      |     |
|----------------------------------------------------|----------|-----------------------------------------------------------------------------------------------------------------------------------|-----------------------------------------|-----------------------|------------------------------------------------------------------------------------------------------------------------------------------------------------------------------------------------------------------------------------------------------------------------------------------------------------------------------------------------------------------------------------------------------------------------------------------------------------------------------------------------------------------------------------------------------------------------------------------------------------------------------------------------------------------------------------------------------------------------------------------------------------------------------------------------------------------------------------------------------------------------------------------------------|-----|
|                                                    | MOHLAA-Q | (media: internet, TV, radio, press)<br>judge whether you can trust the media when they warn you of health risks                   | Dealing with health-related information | Information appraisal | items in three areas: (A) dealing with health-related information, (B) interaction and communication skills, (C) Attitudes towards one's own health and health information. Critical appraisal is measured through three items in scale A, asking participants to respond to how difficult it is for you to: (info 4) judge which information about an illness in the media you can trust and which you cannot (media: internet, TV, radio, press), (info 8) judge whether you can trust the media when they warn you of health risks, (info 13) judge how what you do daily affects your health (e. g. eating, drinking, exercise, relaxation, body care).                                                                                                                                                                                                                                          |     |
|                                                    | MOHLAA-Q | judge how what you do daily affects your health (e. g. eating, drinking, exercise, relaxation, body care).                        | Dealing with health-related information | Information appraisal |                                                                                                                                                                                                                                                                                                                                                                                                                                                                                                                                                                                                                                                                                                                                                                                                                                                                                                      |     |
|                                                    | HLAT-8   | How well are you doing in choosing the advices and offers that fit with you the most?                                             | Critical level of health literacy       | Information appraisal | Abel, Hofmann, Ackermann, Bucher, and Sakarya (2015) developed a short instrument of health literacy for family and private contexts based on population survey data in Switzerland (HLAT-8). The measure includes 8 items and three dimensions, four measuring functional HL, and two items each for interactive and critical HL. A strength with HLAT-8 is that it is short, and easy to distribute, it also prompts the respondents to relate items to a family and friends realm, which is essential for HL in childhood and adolescence (Guo et al., 2018). The two items measuring critical HL are: (HL7) How well are you doing in choosing the advice and offers that fit with you the most? and (HL8) regarding information on health on the Internet, I'm able to determine which of the sources are of high and which of poor quality.                                                    | [3] |
|                                                    | HLAT-8   | regarding information on health on the Internet, I'm able to determine which of the sources are of high and which of poor quality | Critical level of health literacy       | Information appraisal |                                                                                                                                                                                                                                                                                                                                                                                                                                                                                                                                                                                                                                                                                                                                                                                                                                                                                                      |     |
| <b>The Health Literacy Measure for Adolescents</b> | HELMA    | <i>When faced with new health information...</i><br>I can judge its accuracy                                                      | Appraisal                               | Information appraisal | The Health Literacy Measure for Adolescents (HELMA) was developed for adolescents aged 15-18 years old in Iran (Ghanbari, Ramezankhani, Montazeri, & Mehrabi, 2016). It is a multidimensional comprehensive measure with eight factors and 44 items, items are not evenly distributed between factors, ranging from 10 items in understanding to 3 items in numeracy. The numeracy items are performance based, while the other factors are self-reported. HELMA showed good overall internal consistency (Cronbachs $\alpha = 0.93$ ). However, some of the subscales did not. The critical aspect is measured through appraisal in five items; When faced with new health information (25) I can judge its accuracy, (26) I would compare the data obtained from various sources, (27) When dealing with conflicting information about health issues I can recognize the correct information, (28) | [4] |
|                                                    | HELMA    | I would compare the data obtained from various sources                                                                            | Appraisal                               | Information appraisal |                                                                                                                                                                                                                                                                                                                                                                                                                                                                                                                                                                                                                                                                                                                                                                                                                                                                                                      |     |
|                                                    | HELMA    | When dealing with conflicting information about health issues I can recognize the correct information                             | Appraisal                               | Information appraisal |                                                                                                                                                                                                                                                                                                                                                                                                                                                                                                                                                                                                                                                                                                                                                                                                                                                                                                      |     |

|                                                                   |               |                                                                                                                                             |                              |                                             |                                                                                                                                                                                                                                                                                                                                                                                                                                                                                                                                                                                                                                                                                                                   |     |
|-------------------------------------------------------------------|---------------|---------------------------------------------------------------------------------------------------------------------------------------------|------------------------------|---------------------------------------------|-------------------------------------------------------------------------------------------------------------------------------------------------------------------------------------------------------------------------------------------------------------------------------------------------------------------------------------------------------------------------------------------------------------------------------------------------------------------------------------------------------------------------------------------------------------------------------------------------------------------------------------------------------------------------------------------------------------------|-----|
|                                                                   | HELMA         | I have the ability to judge which resources I can trust                                                                                     | Appraisal                    | Information appraisal                       | I have the ability to judge which resources I can trust, and (29) when dealing with nutritional information I can choose the right information.                                                                                                                                                                                                                                                                                                                                                                                                                                                                                                                                                                   |     |
|                                                                   | HELMA         | When dealing with nutritional information I can choose the right information                                                                | Appraisal                    | Information appraisal                       |                                                                                                                                                                                                                                                                                                                                                                                                                                                                                                                                                                                                                                                                                                                   |     |
|                                                                   | HELMA         | I can share the health information that I gather with others (e.g. family, friends, etc.)                                                   | Communication                | Collective action for health and well-being |                                                                                                                                                                                                                                                                                                                                                                                                                                                                                                                                                                                                                                                                                                                   |     |
| <b>European Health Literacy Survey Questionnaire for Children</b> |               | <i>How easy or difficult is it for you to...</i>                                                                                            |                              |                                             |                                                                                                                                                                                                                                                                                                                                                                                                                                                                                                                                                                                                                                                                                                                   |     |
|                                                                   | HLS-Child-Q15 | judge what helps a lot for you to stay healthy and what does not help much?                                                                 | Appraisal/understanding      | Information appraisal                       | HLS-Child-Q15 was adapted for children aged 9-10 years (T. M. Bollweg, Okan, Pinheiro, & Bauer, 2016). In total 26 items were modified and distributed to a sample of German children. Eleven items were deleted in the psychometric analysis and the final instrument consisted of 15 items measuring generic HL, of which one item was intended to measure the appraisal dimension.                                                                                                                                                                                                                                                                                                                             | [5] |
|                                                                   | HLS-Child-Q15 | find out which food is healthy for you?                                                                                                     | Access                       | Information appraisal                       |                                                                                                                                                                                                                                                                                                                                                                                                                                                                                                                                                                                                                                                                                                                   |     |
| <b>Health Literacy for School-Aged Children</b>                   |               | <i>I am confident that...</i>                                                                                                               |                              |                                             |                                                                                                                                                                                                                                                                                                                                                                                                                                                                                                                                                                                                                                                                                                                   |     |
|                                                                   | HLSAC         | I can compare health-related information from different sources                                                                             | Individual critical thinking | Information appraisal                       | Another measure that was created for the school context is the Health literacy for school-aged children (HLSAC) (O. Paakkari, Torppa, Kannas, & Paakkari, 2016). It is based on the theoretical framework of HL as learning outcomes for the Finish school context where HL is defined as: “Health literacy comprises a broad range of competencies that people seek to encompass, evaluate, construct and use. Through health literacy competencies people become able to understand themselves, others and the world in a way that will enable them to make sound health decisions, and to work on and change the factors that constitute their own and others’ health chances” (L. Paakkari & Paakkari, 2012). | [6] |
|                                                                   | HLSAC         | I can judge how my own actions affect the surrounding natural environment                                                                   | Citizenship                  | Collective action for health and well-being | HLSAC measures subjective HL with ten items in one factor with five theoretically distinct components. These are ordered from the least complex to more advanced: (1) theoretical knowledge, (2) practical knowledge, (3) individual critical thinking, (4) self-awareness and (5) citizenship. Theoretically the components of self-awareness and citizenship are related to the domain for collective action for health, that is the third domain for CHL.                                                                                                                                                                                                                                                      |     |
|                                                                   | HLSAC         | When necessary I am able to give ideas on how to improve health in my immediate surroundings (e.g. a nearby place or area, family, friends) | Citizenship                  | Collective action for health and well-being |                                                                                                                                                                                                                                                                                                                                                                                                                                                                                                                                                                                                                                                                                                                   |     |

|       |                                                                               |                              |                                             |                                                                                                                                                                                      |
|-------|-------------------------------------------------------------------------------|------------------------------|---------------------------------------------|--------------------------------------------------------------------------------------------------------------------------------------------------------------------------------------|
| HLSAC | I can judge how my behaviour affects my health                                | Self-awareness               | Collective action for health and well-being | Within this framework citizenship evolves around abilities to understand and act upon both the rights and responsibilities that comes with participation in a democratic collective. |
| HLSAC | I can usually figure out if some health-related information is right or wrong | Individual critical thinking | Information appraisal                       |                                                                                                                                                                                      |

#### Health literacy in the Canadian high school context

Wu et al. (2010) developed a performance-based instrument for measuring HL in Canadian high school students. The instrument consisted of 11 passages of health information followed by two general types of items, that is 30 understand items and 17 evaluate items. The understand items assessed prose, numeracy and document understanding. The evaluate items were distributed across five criteria that can be used to judge the reliability of health information: (1) accuracy, (2) impartiality, (3) relevance, (4) comprehensiveness and (5) internal consistency. A relatively small sample of 275 high school students participated in the study, and principal component analysis was used to confirm the one-dimensionality of the instruments two scales (understand and evaluate). Self-reported health literacy was slightly positively correlated with performance-based health literacy, however it is not clear exactly how this was measured, as it is only listed as self-ratings of HL. Overall, the instrument provides a detailed measurement of student's ability to understand and evaluate health related information, however only including performance-based items related to understanding and evaluating health information restricts the measure to cognitive and functional abilities. Also, it has been criticized for being time-consuming and difficult to complete (Ghanbari et al., 2016), which is of great importance in a school context.

[7]

#### A short description of the strategy used in the LR

We found four comprehensive literature reviews and used these as a vantage point (Guo et al., 2018; Okan et al., 2018; Ormshaw, Paakkari, & Kannas, 2013; Perry, 2014). Studies in these reviews were examined and included by the following criteria. (1) Instruments had to be developed for children and adolescents (aged 10-17 years), (2) instruments had to be developed for the general population and for generic HL (domain specific instruments were excluded, e.g. HL in cancer treatment or media health literacy), (3) articles had to be available in English.

In addition, we performed a search in the following data bases: CINAHL, ERIC, MEDLINE, SPORTDiscus, Education Source, Academic Search Ultimate (through EBSCOhost) and the Web of Science with the following combination of search terms ("Health literacy" OR "critical health literacy" [Ti]) AND (Youth\* OR Adolescent\* OR Children\*) AND (measur\* OR test\* OR tool\* OR instrument\* OR questionnaire\* OR assessment\* OR screen\* OR survey\* OR psychometric\* OR review\*) limited to publications between

2018–2020 to identify instruments published after the latest systematic review. Abstracts were scanned and relevant articles included following the stipulated criterions. Two additional instruments were added (Torsten Michael Bollweg et al., 2020; Domanska et al., 2020). The articles identified in this review were read in detail and used for inspiration to adapt and write new items throughout the development process. No further analysis of the articles was done for the purpose of this study.

## References

1. Manganello, J. A., DeVellis, R. F., Davis, T. C., & Schottler-Thal, C. (2015). Development of the Health Literacy Assessment Scale for Adolescents (HAS-A). *Journal of Communication in Healthcare*, 2015, 8, 172–184. doi:10.1179/1753807615Y.0000000016.
2. Domanska, O. M., Bollweg, T. M., Loer, A. K., Holmberg, C., Schenk, L., & Jordan, S. (2020). Development and Psychometric Properties of a Questionnaire Assessing Self-Reported Generic Health Literacy in Adolescence. *Int J Environ Res Public Health*. 2020, 17, 2860. doi: 10.3390/ijerph17082860.
3. Abel, T., Hofmann, K., Ackermann, S., Bucher, S., & Sakarya, S. (2015). Health literacy among young adults: a short survey tool for public health and health promotion research. *Health Promot Int*, 30(3), 725–735. doi:10.1093/heapro/dat096
4. Ghanbari, S., Ramezankhani, A., Montazeri, A., & Mehrabi, Y. (2016). Health Literacy Measure for Adolescents (HELMA): Development and Psychometric Properties. *PLoS ONE*, 11(2), 1–12. doi:10.1371/journal.pone.0149202
5. Bollweg, T. M., Okan, O., Pinheiro, P., & Bauer, U. (2016). Development of a health literacy measurement tool for primary school children in Germany. *Health Lit Res Pract*. 2020, 4, e144–e159.
6. Paakkari, O., Torppa, M., Kannas, L., & Paakkari, L. (2016). Subjective health literacy: Development of a brief instrument for school-aged children. *Scandinavian Journal of Public Health*, 44(8), 751–757. doi:10.1177/1403494816669639
7. Wu, A. D.; Begoray, D. L.; MacDonald, M.; Wharf Higgins, J.; Frankish, J.; Kwan, B.; Rootman, I. (2010). Developing and evaluating a relevant and feasible instrument for measuring health literacy of Canadian high school students. *Health Promotion International*, 25(4), 444–452. Retrieved from <https://login.ezproxy.hioa.no/login?url=http://search.ebscohost.com/login.aspx?direct=true&db=asn&AN=55276133&site=ehost-live>
